# Supplementary material for: A series of pyridyl-amide-based ZnII/CdII coordination polymers and their polypyrrole-functionalized composite materials for tuning their photocatalytic properties
Source: Royal Society of Chemistry journal article supplement (doi:10.1039/c6ra18428f), 2016-01-01
Supplement: c6ra18428f1.pdf [file c6ra18428f1.pdf]

# A series of pyridyl-amide-based Zn<sup>II</sup>/Cd<sup>II</sup> coordination polymers and their polypyrrole-functionalized composite materials for tuning their photocatalytic properties

Xiu-Li Wang\*, Xiao-Mei Wu, Guo-Cheng Liu, Hong-Yan Lin and Xiang Wang

*Department of Chemistry, Bohai University, Liaoning Province Silicon Materials*

*Engineering Technology Research Centre, Jinzhou 121000, P. R. China*

**Table S1** Selected bond distances (Å) and angles (°) for **CP1–CP6**.

| <b>CP1</b> C <sub>32</sub> H <sub>25</sub> Cd N <sub>5</sub> O <sub>11</sub>  |            |                     |            |
|-------------------------------------------------------------------------------|------------|---------------------|------------|
| Cd(1)-O(1)                                                                    | 2.200(8)   | Cd(1)-O(1W)         | 2.314(8)   |
| Cd(1)-N(4)#1                                                                  | 2.344(10)  | Cd(1)-O(4)#2        | 2.345(8)   |
| Cd(1)-N(1)                                                                    | 2.370(9)   | Cd(1)-O(3)          | 2.442(9)   |
| O(1)-Cd(1)-O(1W)                                                              | 85.5(3)    | O(1)-Cd(1)-N(4)#1   | 123.5(3)   |
| O(1W)-Cd(1)-N(4)#1                                                            | 80.1(3)    | O(1)-Cd(1)-O(4)#2   | 95.5(3)    |
| O(1W)-Cd(1)-O(4)#2                                                            | 101.8(3)   | N(4)#1-Cd(1)-O(4)#2 | 140.9(3)   |
| O(1)-Cd(1)-N(1)                                                               | 94.7(3)    | O(1W)-Cd(1)-N(1)    | 168.2(4)   |
| N(4)#1-Cd(1)-N(1)                                                             | 90.1(3)    | O(4)#2-Cd(1)-N(1)   | 90.0(3)    |
| O(1)-Cd(1)-O(3)                                                               | 150.2(3)   | O(1W)-Cd(1)-O(3)    | 99.0(3)    |
| N(4)#1-Cd(1)-O(3)                                                             | 86.3(3)    | O(4)#2-Cd(1)-O(3)   | 54.7(3)    |
| N(1)-Cd(1)-O(3)                                                               | 86.8(3)    |                     |            |
| Symmetry code for <b>CP1</b> : #1 3/2 + x, 1/2 - y, 1/2 + z; #2 -1 + x, y, z  |            |                     |            |
| <b>CP2</b> C <sub>34</sub> H <sub>29</sub> N <sub>5</sub> O <sub>8</sub> S Cd |            |                     |            |
| Cd(1)-O(1)                                                                    | 2.302(2)   | Cd(1)-O(3)#1        | 2.306(2)   |
| Cd(1)-N(1)                                                                    | 2.339(3)   | Cd(1)-N(4)          | 2.388(3)   |
| Cd(1)-O(7)#2                                                                  | 2.442(3)   | Cd(1)-O(4)          | 2.484(3)   |
| Cd(1)-O(2)                                                                    | 2.538(3)   | O(1)-Cd(1)-O(3)#1   | 141.90(10) |
| O(1)-Cd(1)-N(1)                                                               | 86.95(10)  | O(3)#1-Cd(1)-N(1)   | 94.09(10)  |
| O(1)-Cd(1)-N(4)                                                               | 84.34(9)   | O(3)#1-Cd(1)-N(4)   | 133.53(9)  |
| N(1)-Cd(1)-N(4)                                                               | 92.49(11)  | O(1)-Cd(1)-O(7)#2   | 88.63(9)   |
| O(3)#1-Cd(1)-O(7)#2                                                           | 90.10(9)   | N(1)-Cd(1)-O(7)#2   | 175.44(9)  |
| N(4)-Cd(1)-O(7)#2                                                             | 85.92(10)  | O(1)-Cd(1)-O(4)     | 164.11(10) |
| O(3)#1-Cd(1)-O(4)                                                             | 53.92(10)  | N(1)-Cd(1)-O(4)     | 90.55(11)  |
| N(4)-Cd(1)-O(4)                                                               | 80.09(10)  | O(7)#2-Cd(1)-O(4)   | 93.39(10)  |
| O(1)-Cd(1)-O(2)                                                               | 53.84(9)   | O(3)#1-Cd(1)-O(2)   | 89.03(9)   |
| N(1)-Cd(1)-O(2)                                                               | 102.39(10) | N(4)-Cd(1)-O(2)     | 133.96(9)  |
| O(7)#2-Cd(1)-O(2)                                                             | 75.83(9)   | O(4)-Cd(1)-O(2)     | 141.79(9)  |
| Symmetry code for <b>CP2</b> : #1 1 + x, y, z; #2 2 - x, -y, 1 - z            |            |                     |            |

**CP3** C<sub>30</sub>H<sub>24</sub>N<sub>4</sub>O<sub>9</sub>SCd

|                   |           |                     |           |
|-------------------|-----------|---------------------|-----------|
| Cd(1)-O(4)        | 2.270(2)  | Cd(1)-O(1)          | 2.325(2)  |
| Cd(1)-N(1)        | 2.352(3)  | Cd(1)-N(4)          | 2.371(2)  |
| Cd(1)-O(7)#1      | 2.501(2)  | Cd(1)-O(3)#2        | 2.535(2)  |
| Cd(1)-O(2)        | 2.565(3)  | O(4)-Cd(1)-O(1)     | 141.44(8) |
| O(4)-Cd(1)-N(1)   | 97.67(9)  | O(1)-Cd(1)-N(1)     | 86.23(9)  |
| O(4)-Cd(1)-N(4)   | 133.37(8) | O(1)-Cd(1)-N(4)     | 84.48(8)  |
| N(1)-Cd(1)-N(4)   | 91.78(9)  | O(4)-Cd(1)-O(7)#1   | 88.06(9)  |
| O(1)-Cd(1)-O(7)#1 | 92.45(9)  | N(1)-Cd(1)-O(7)#1   | 172.36(8) |
| N(4)-Cd(1)-O(7)#1 | 80.60(8)  | O(4)-Cd(1)-O(3)#2   | 54.14(8)  |
| O(1)-Cd(1)-O(3)#2 | 163.53(9) | N(1)-Cd(1)-O(3)#2   | 85.63(9)  |
| N(4)-Cd(1)-O(3)#2 | 81.49(8)  | O(7)#1-Cd(1)-O(3)#2 | 93.72(9)  |
| O(4)-Cd(1)-O(2)   | 89.28(8)  | O(1)-Cd(1)-O(2)     | 53.29(8)  |
| N(1)-Cd(1)-O(2)   | 106.44(8) | N(4)-Cd(1)-O(2)     | 131.32(8) |
| O(7)#1-Cd(1)-O(2) | 78.57(7)  | O(3)#2-Cd(1)-O(2)   | 143.07(8) |

Symmetry code for **CP3**: #1 2 - x, -y, 1 - z; #2 -1 + x, y, z**CP4** C<sub>30</sub>H<sub>24</sub>N<sub>4</sub>O<sub>9</sub>SZn

|                   |            |                     |           |
|-------------------|------------|---------------------|-----------|
| Zn(1)-O(4)#1      | 1.945(2)   | Zn(1)-O(1)          | 1.953(2)  |
| Zn(1)-N(1)        | 2.088(3)   | Zn(1)-N(4)#2        | 2.112(3)  |
| O(4)#1-Zn(1)-O(1) | 129.12(10) | O(4)#1-Zn(1)-N(1)   | 96.41(10) |
| O(1)-Zn(1)-N(1)   | 125.40(10) | O(4)#1-Zn(1)-N(4)#2 | 94.88(10) |
| O(1)-Zn(1)-N(4)#2 | 103.64(10) | N(1)-Zn(1)-N(4)#2   | 99.94(10) |

Symmetry code for **CP4**: #1 1 + x, y, z; #2 -1 + x, y, -1 + z**CP5** C<sub>32</sub>H<sub>24</sub>N<sub>4</sub>O<sub>8</sub>Zn

|                   |          |                     |          |
|-------------------|----------|---------------------|----------|
| Zn(1)-O(4)#1      | 1.898(5) | Zn(1)-O(1)          | 1.942(4) |
| Zn(1)-N(1)        | 2.072(6) | Zn(1)-N(4)#2        | 2.123(6) |
| O(4)#1-Zn(1)-O(1) | 133.8(2) | O(4)#1-Zn(1)-N(1)   | 118.7(2) |
| O(1)-Zn(1)-N(1)   | 98.1(2)  | O(4)#1-Zn(1)-N(4)#2 | 103.6(2) |
| O(1)-Zn(1)-N(4)#2 | 94.9(2)  | N(1)-Zn(1)-N(4)#2   | 100.9(2) |

Symmetry code for **CP5** #1 -1 + x, y, z; #2 -1 + x, y, -1 + z**CP6** C<sub>40</sub>H<sub>30</sub>N<sub>6</sub>O<sub>13</sub>Zn<sub>2</sub>

|                     |            |                   |            |
|---------------------|------------|-------------------|------------|
| Zn(1)-O(1)          | 1.940(2)   | Zn(1)-O(4)#1      | 1.972(2)   |
| Zn(1)-N(1)          | 2.024(3)   | Zn(1)-N(3)#2      | 2.060(3)   |
| O(1)-Zn(1)-O(4)#1   | 100.79(10) | O(1)-Zn(1)-N(1)   | 102.62(12) |
| O(4)#1-Zn(1)-N(1)   | 125.66(12) | O(1)-Zn(1)-N(3)#2 | 109.84(11) |
| O(4)#1-Zn(1)-N(3)#2 | 106.13(11) | N(1)-Zn(1)-N(3)#2 | 110.65(12) |

Symmetry code for **CP6** #1 x, 2 - y, -1/2 + z; #2 x, 1 - y, -1/2 + z**Table S2.** The twist degrees of the L ligand in CP1–CP6.

| CPs        | CP1   | CP2   | CP3   | CP4   | CP5   | CP6   |
|------------|-------|-------|-------|-------|-------|-------|
| $\theta_1$ | 49.44 | 48.93 | 14.97 | 34.92 | 30.71 | 60.28 |
| $\theta_2$ | 63.24 | 33.88 | 49.13 | 88.31 | 87.40 | 44.90 |
| $\theta_3$ | 43.94 | 61.73 | 87.52 | 42.39 | 40.14 | 60.28 |
| $\theta_4$ | 24.71 | 45.89 | 31.77 | 16.56 | 16.57 | 44.90 |

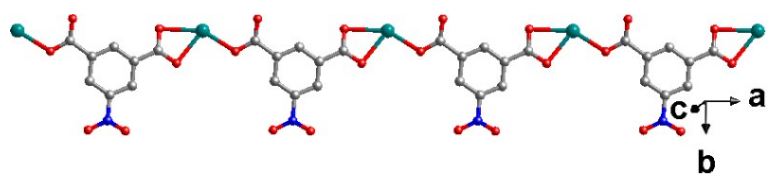

**Fig. S1** The 1D linear  $[\text{Cd}(5\text{-NIP})]_n$  chain in CP1.

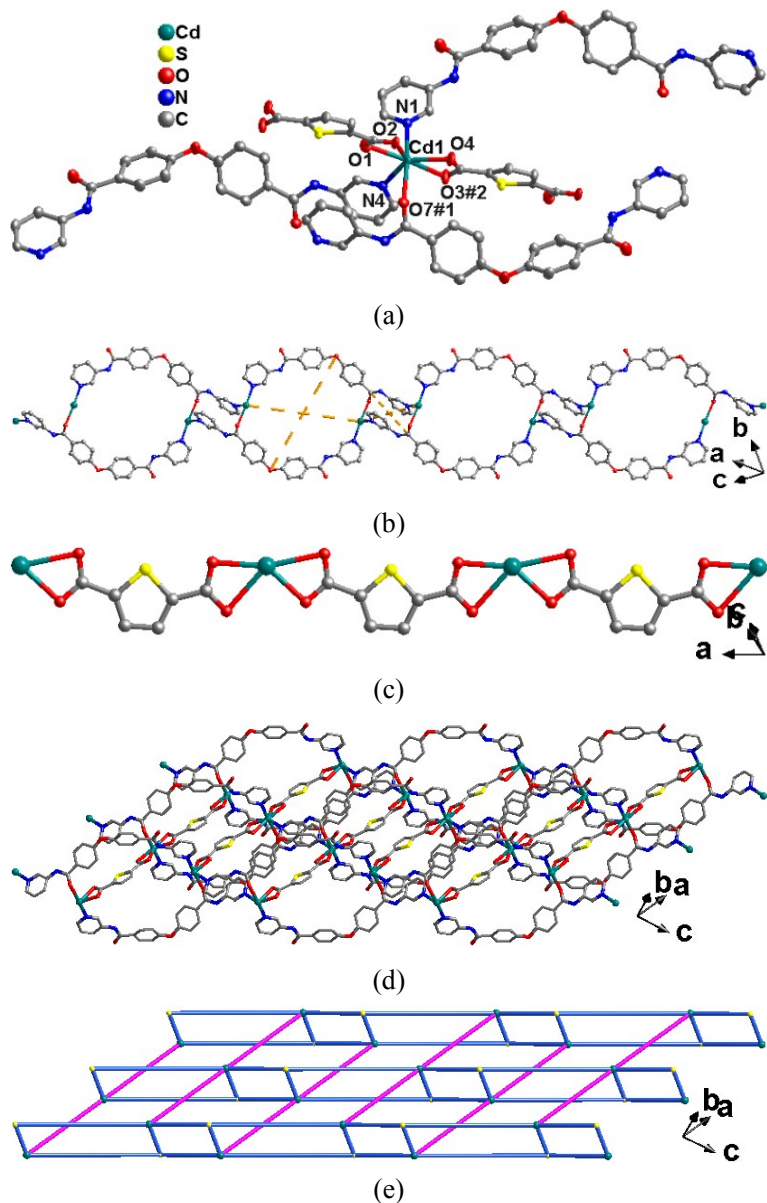

**Fig.S2** (a) Coordination environment of  $\text{Cd}^{\text{II}}$  ion in CP3. All H atoms and lattice water molecules are omitted for clarity (#1  $2 - x, -y, 1 - z$ ; #2  $-1 + x, y, z$ ). (b) The 1D  $[\text{Cd}_2(\text{L})_2]_n$  ladder-like chain of CP3. (c) The 1D linear  $[\text{Cd}(2,5\text{-TPD})]_n$  chain. (d) 2D layer of CP3; (e) Simplification of the 3,5-connected network.

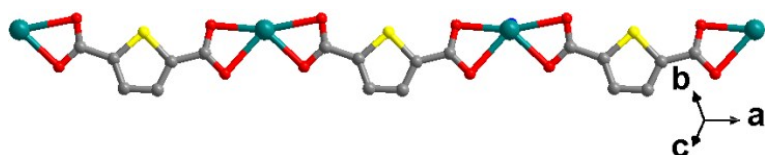

Fig. S3 The 1D  $[\text{Cd}(2,5\text{-TPD})]_n$  linear chain of CP2.

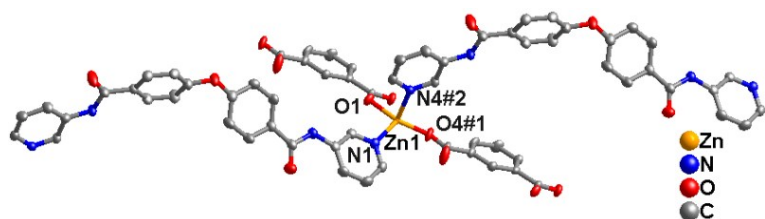

(a)

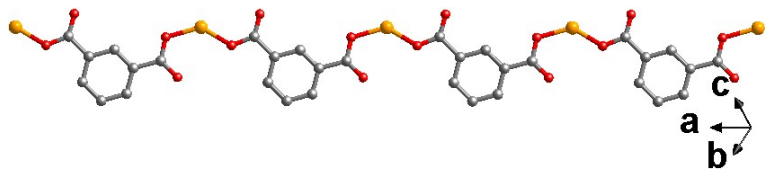

(b)

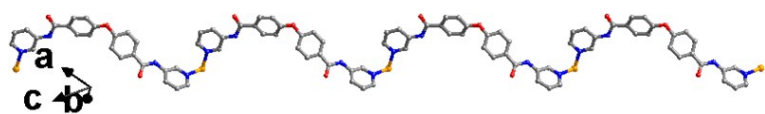

(c)

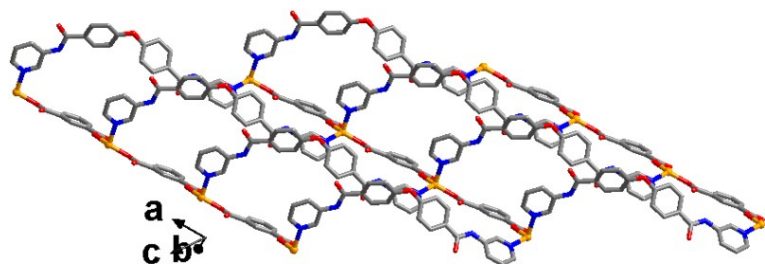

(d)

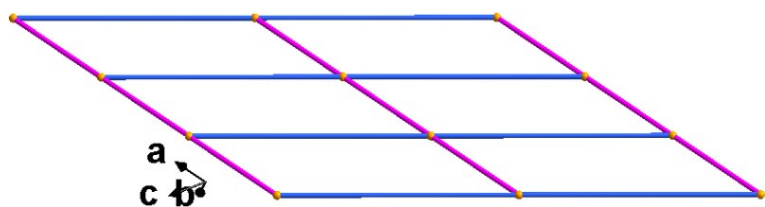

(e)

Fig. S4 (a) The coordination environment of  $\text{Zn}^{\text{II}}$  ion in CP5. All H atoms and lattice water molecules are omitted for clarity (#1  $-1 + x, y, z$ ; #2  $-1 + x, y, -1 + z$ ). (b) View of the 1D  $[\text{Zn}(1,3\text{-BDC})]_n$  linear chain. (c) The 1D  $[\text{Zn}(\text{L})]_n$  wave-like chain. (d) 2D layer of CP5; (e) Simplification of the 4-connected network.

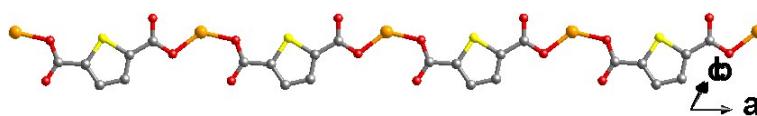

Fig. S5 The 1D  $[\text{Zn}(2,5\text{-TPD})]_n$  infinite linear chain in CP4.

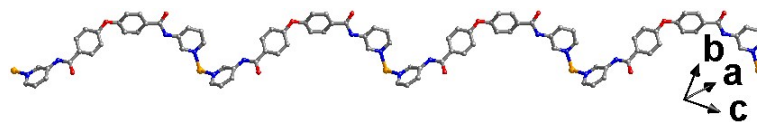

Fig. S6 View of the 1D  $[\text{Zn}(\text{L})]_n$  wave-like chain in CP4.

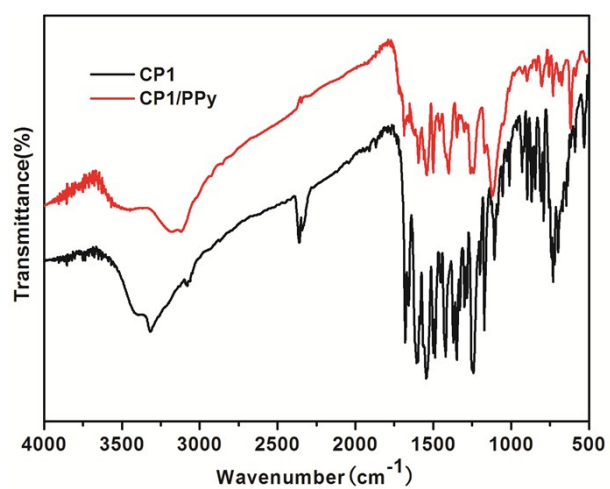

(a)

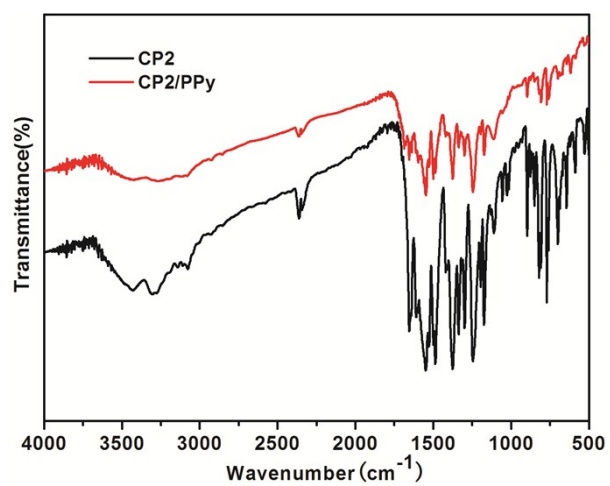

(b)

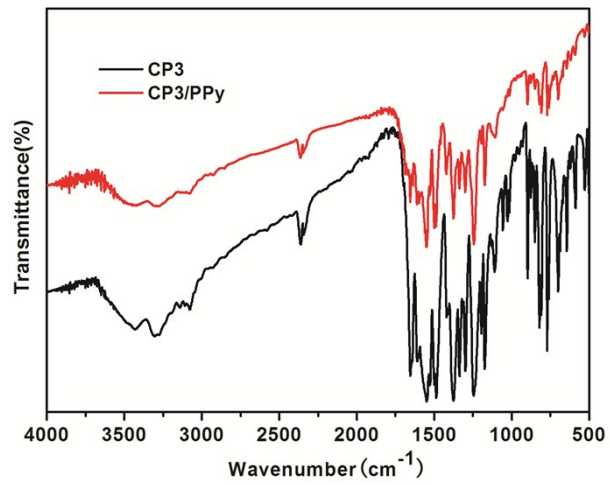

(c)

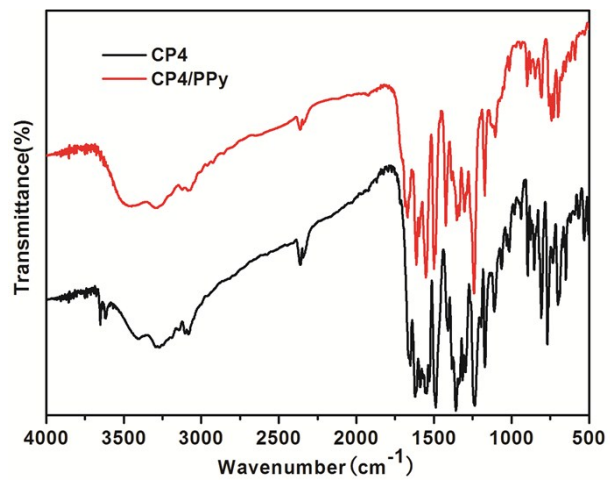

(d)

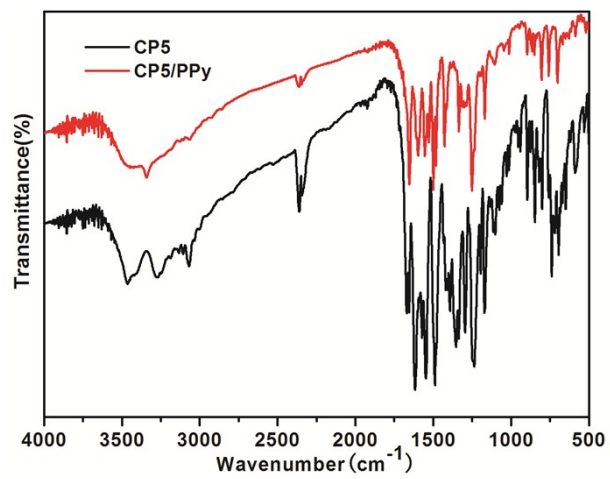

(e)

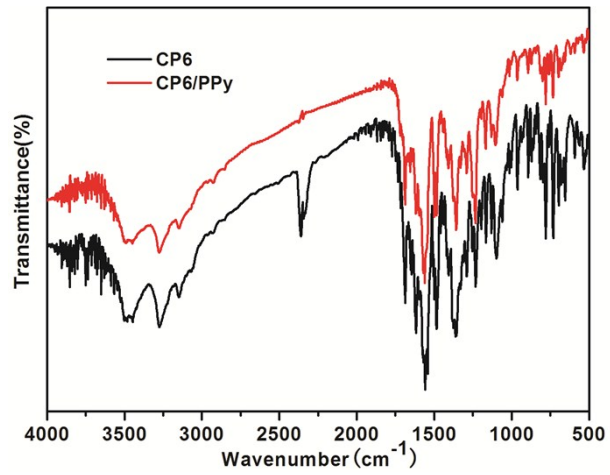

(f)

**Fig. S7** The IR spectra of CP1–CP6 and their PPy/CP1–PPy/CP6 composite materials.

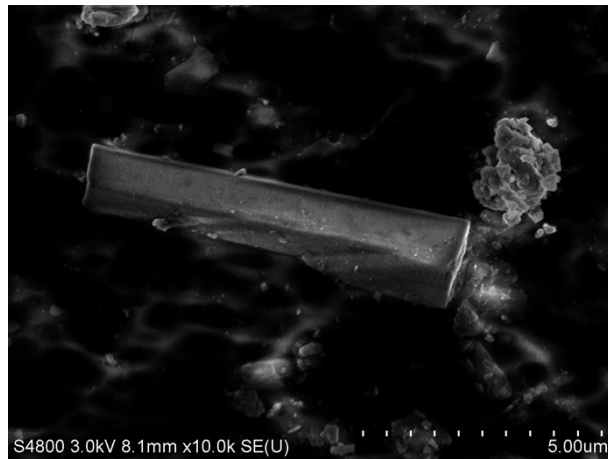

(a)

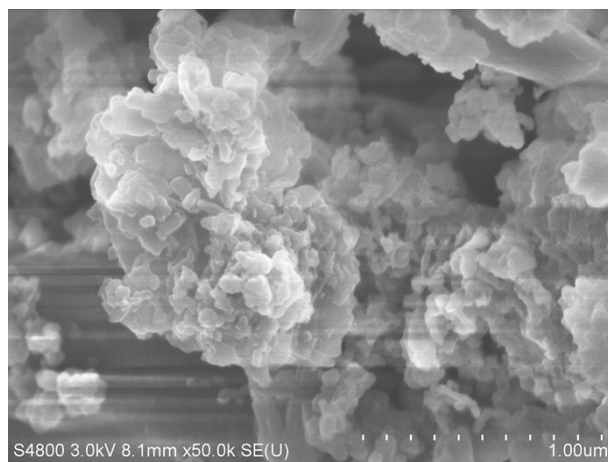

(b)

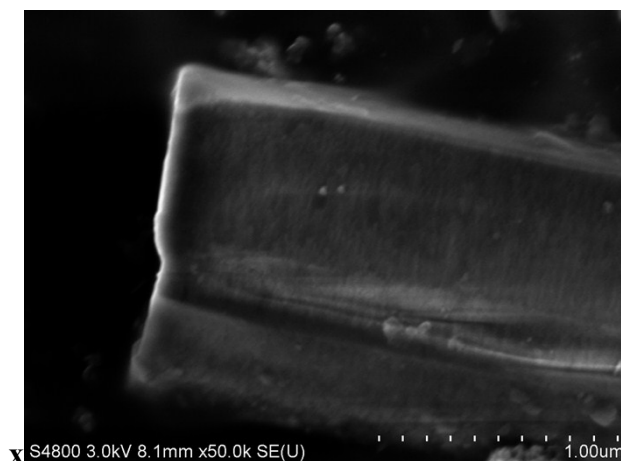

(c)

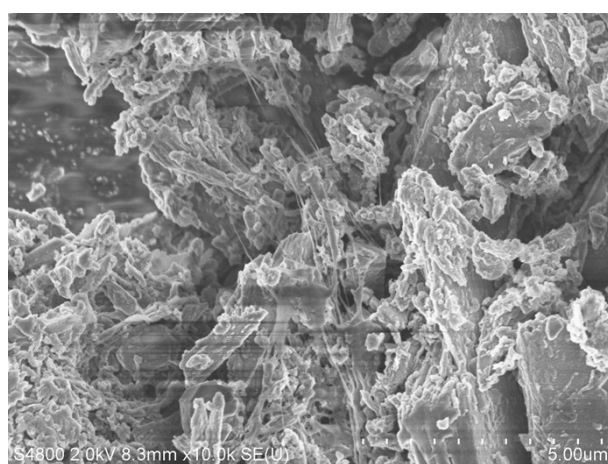

(d)

**Fig. S8** SEM pictures of micro-size particles of CP1 (a), PPy/CP1 (b), CP6 (c), PPy/CP6 (d).

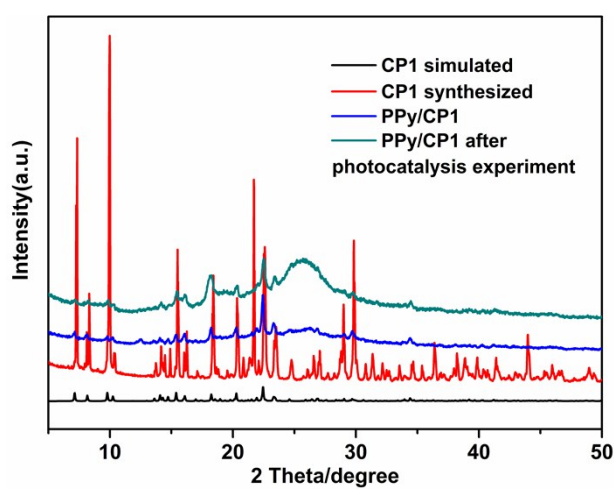

(a)



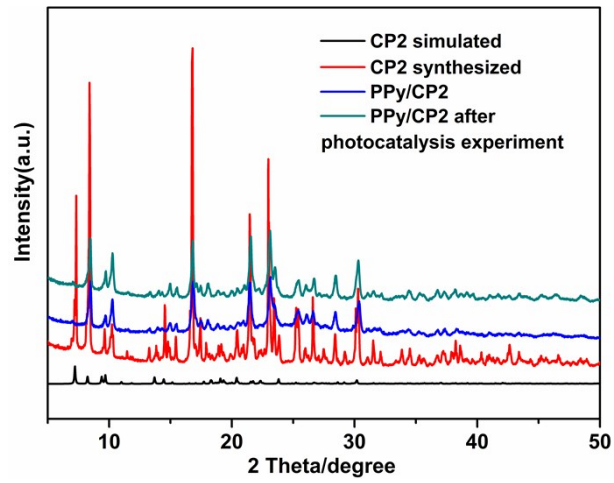

(b)

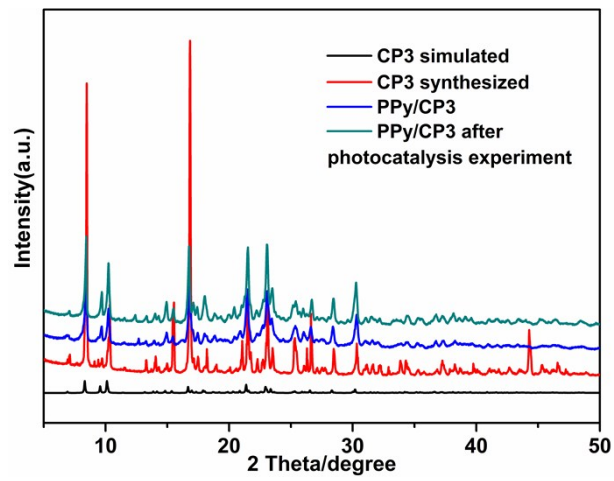

(c)

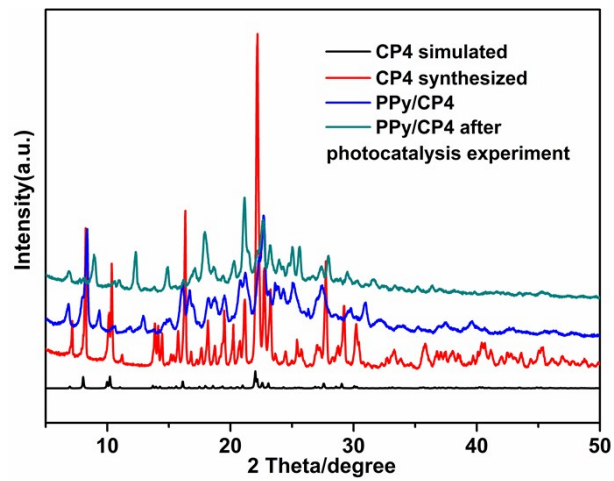

(d)

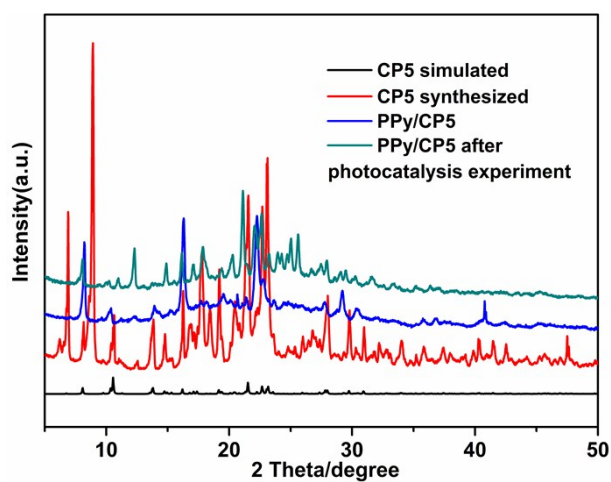

(e)

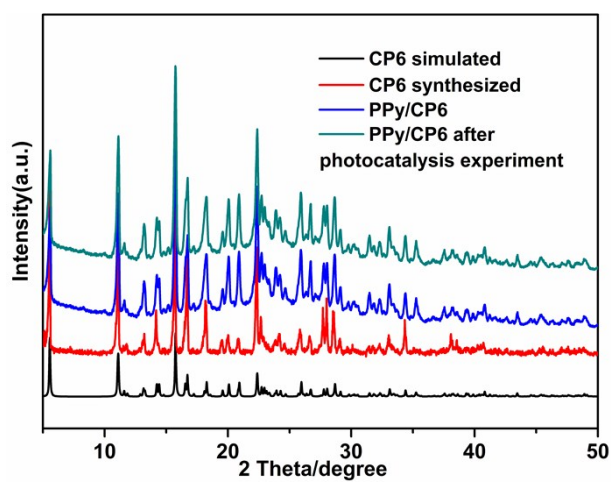

(f)

**Fig. S9** The PXRD patterns of CP1–CP6 and PPy/CP1–PPy/CP6 composite materials and the PXRD patterns of PPy/CP1–PPy/CP6 after photocatalytic processes.

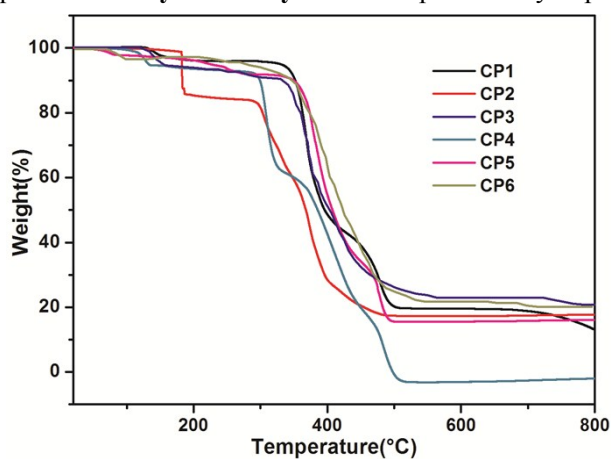

**Fig. S10** The TG curves of compounds CP1–CP6.

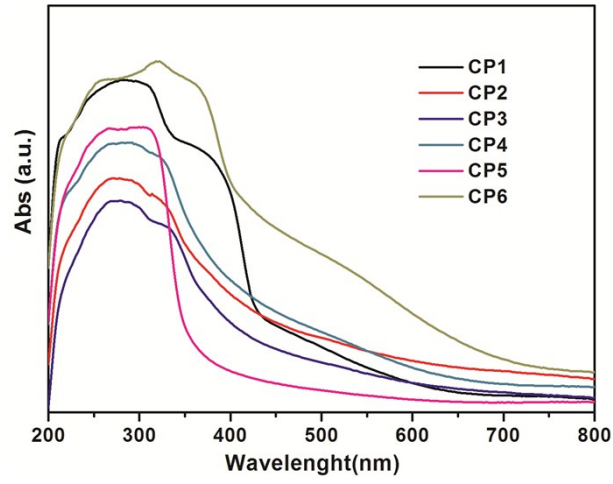

(a)

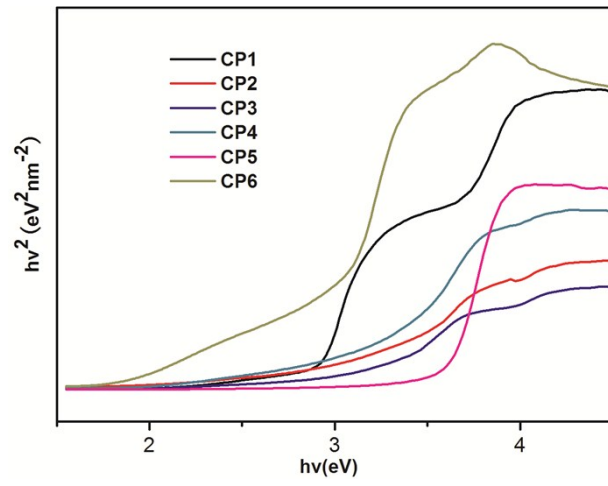

(b)

**Fig. S11** (a) UV-vis diffuse-reflectance spectra of CP1-CP6 with BaSO<sub>4</sub> as background; (b) Tauc plots of CP1-CP6.

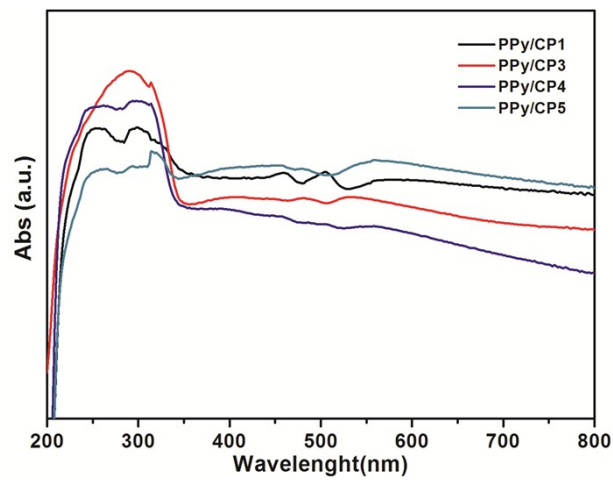

(a)

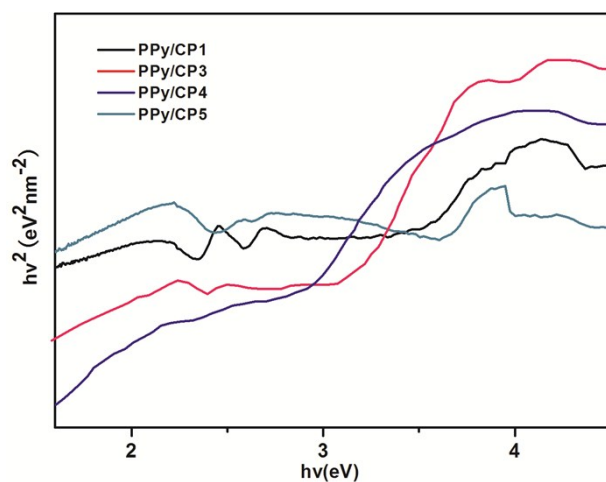

(b)

**Fig. S12** (a) UV-vis diffuse-reflectance spectra of **PPy/CP1**, **PPy/CP3**, **PPy/CP4** and **PPy/CP5** with  $\text{BaSO}_4$  as background; (b) Tauc plots of corresponding composite materials **PPy/CPn**.

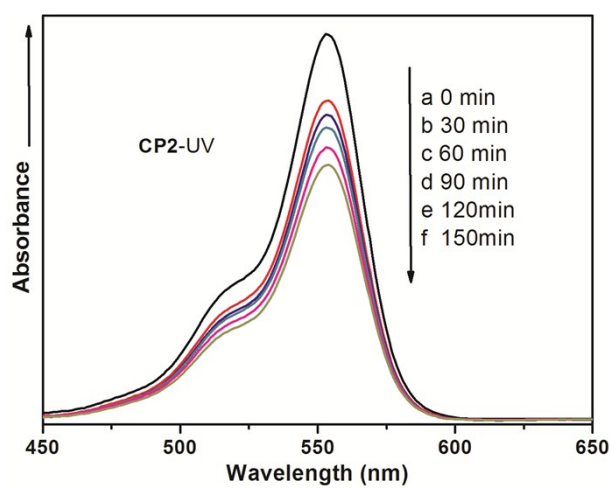

(a)

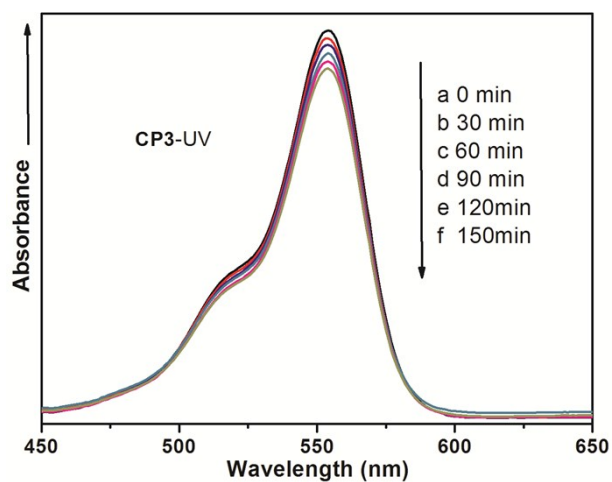

(b)

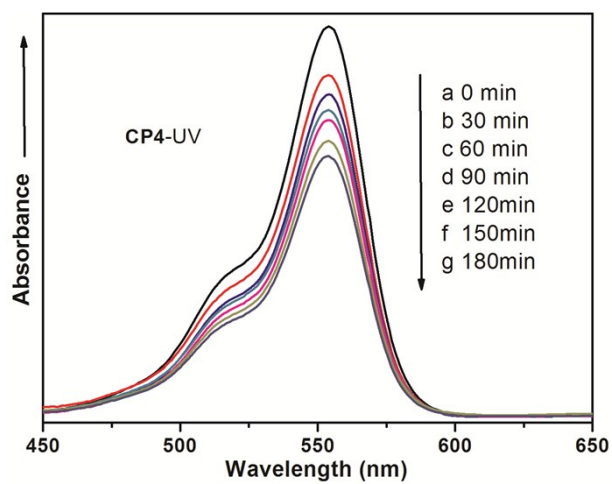

(c)

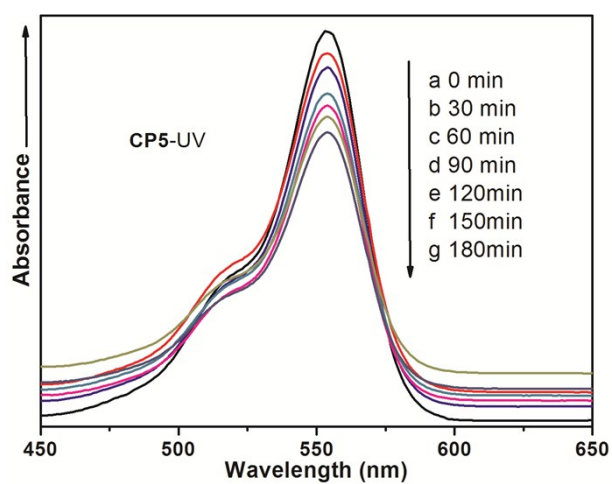

(d)

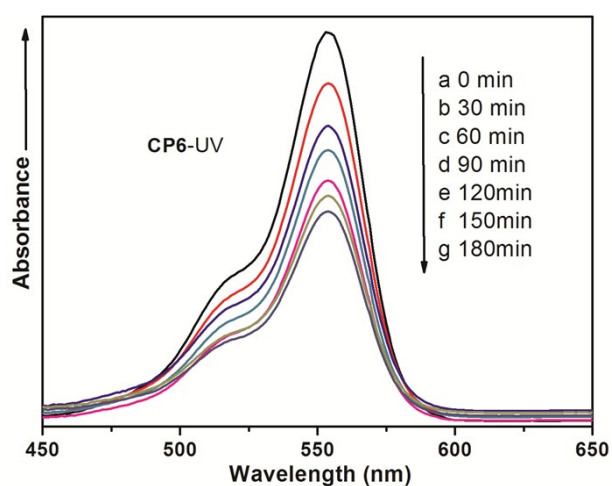

(e)

**Fig. S13** Absorption spectra of the RhB solution during the decomposition reaction under UV irradiation in the presence of CP2–CP6.

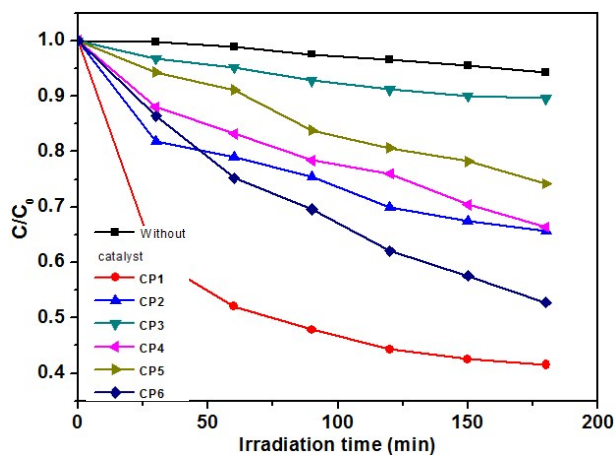

**Fig. S14** The degradation ratio of RhB for CP1–CP6 under UV light irradiation.

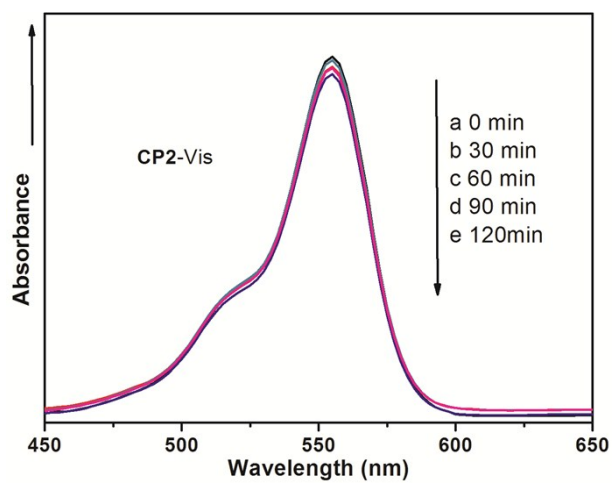

(a)

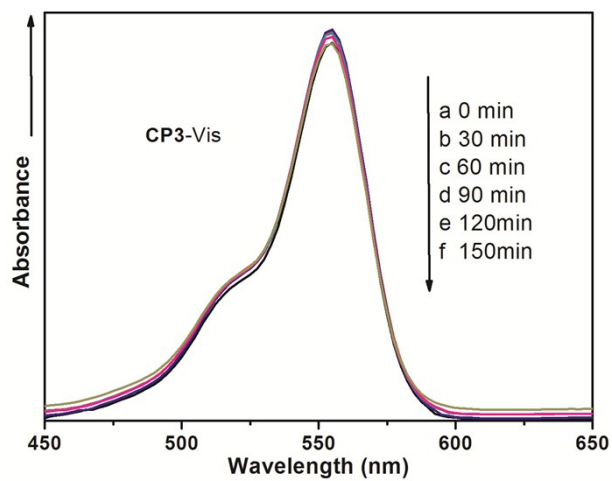

(b)

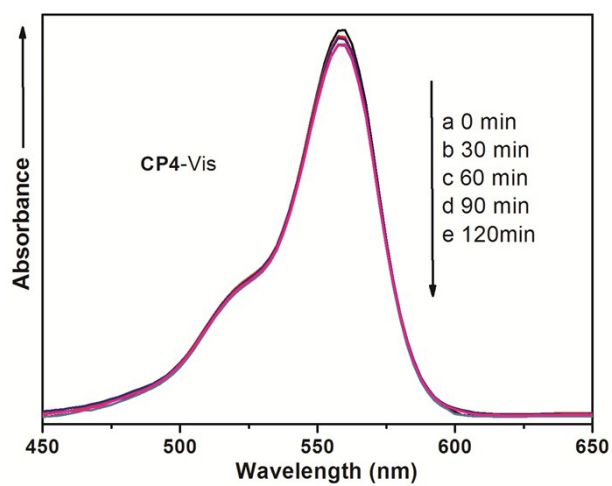

(c)

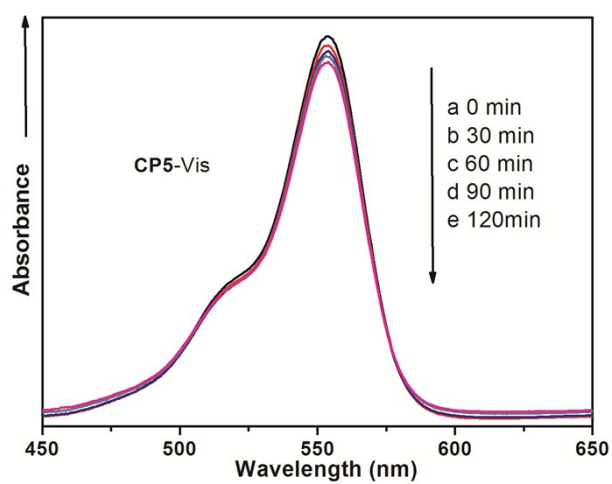

(d)

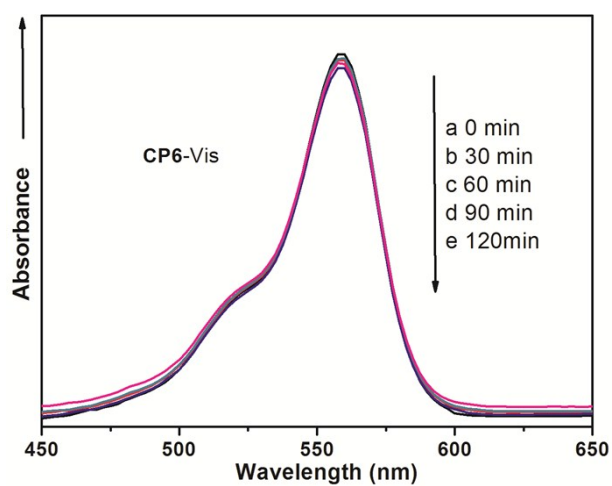

(f)

**Fig. S15** Absorption spectra of the RhB solution during the decomposition reaction under visible light irradiation in the presence of CP2–CP6.

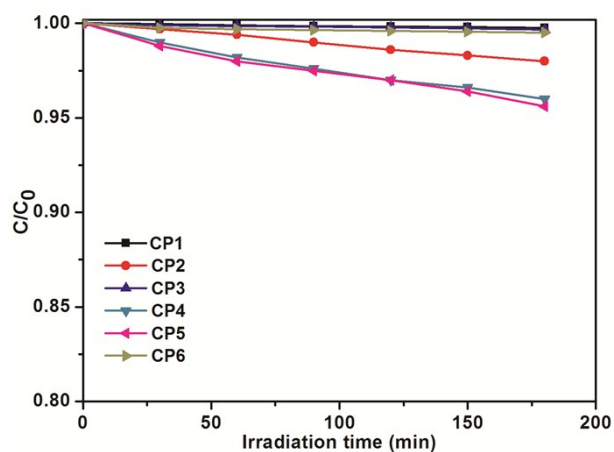

**Fig. S16** The degradation ratio of RhB for CP1–CP6 under visible light irradiation.

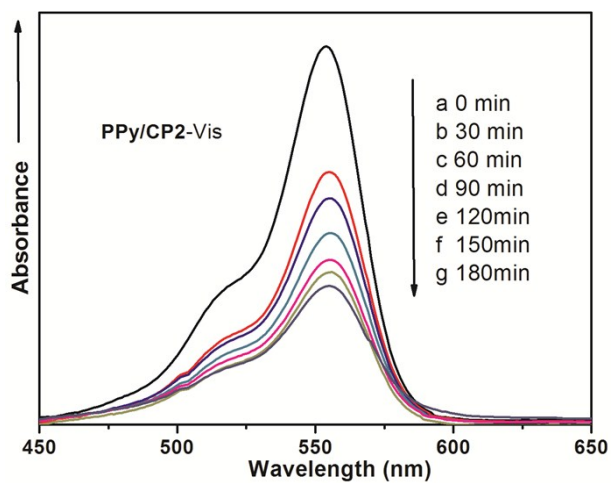

(a)

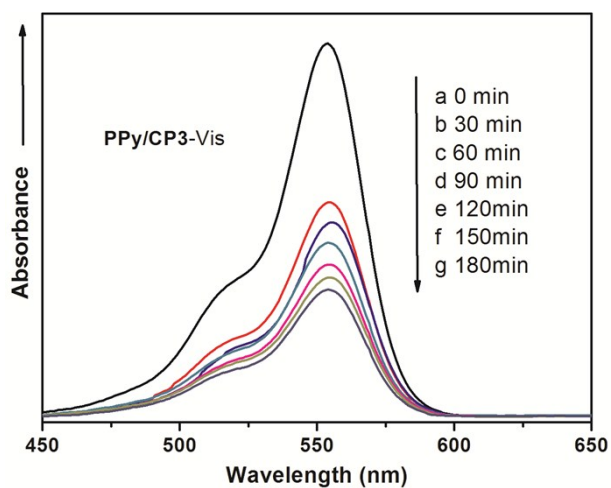

(b)



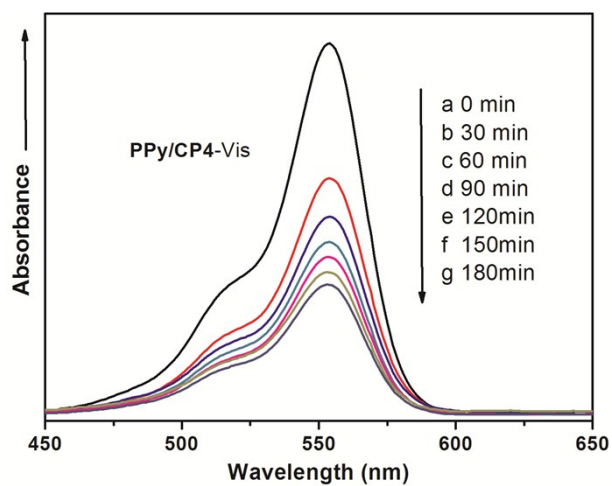

(c)

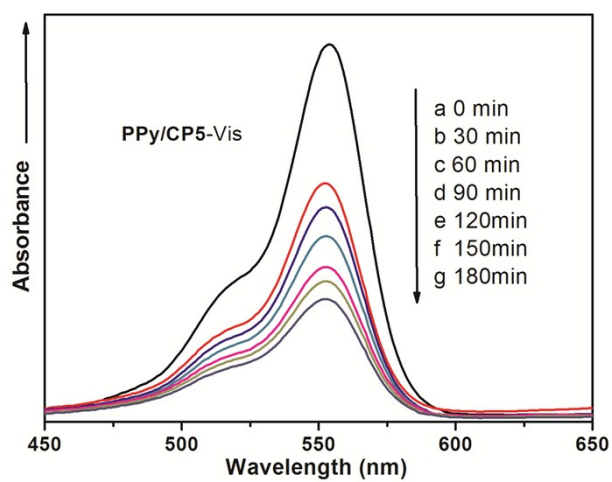

(d)

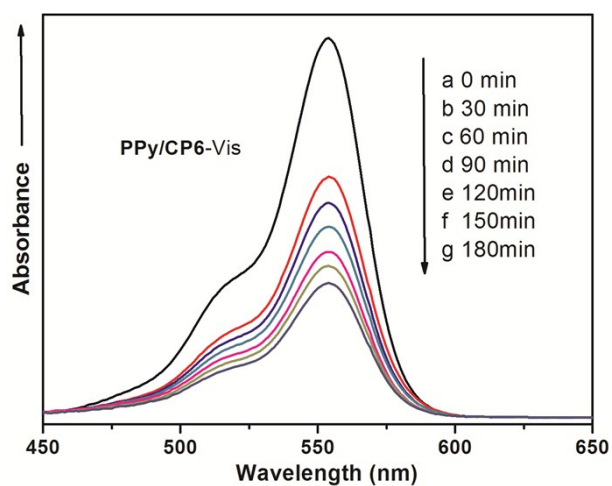

(e)

**Fig. S17** Absorption spectra of the RhB solution during the decomposition reaction under visible irradiation in the presence of PPy/CP2–PPy/CP6 composite materials.
